# Supplementary material for: Long-term expansion of basal cells and the novel differentiation methods identify mechanisms for switching Claudin expression in normal epithelia
Source: Springer Nature journal article supplement (doi:10.1038/s41598-025-95463-3), 2025-04-09

## Supplementary Figures

### **Long-term expansion of basal cells and the novel differentiation methods identify mechanisms for switching Claudin expression in normal epithelia**

Akihito Inoko<sup>1,\*</sup>, Norihito Soga<sup>1,2</sup>, Minako Suzuki<sup>1</sup>, Tohru Kiyono<sup>3</sup>, Junichi Ikenouchi<sup>4</sup>, Takahiro Kojima<sup>2</sup>, Yoshikatsu Sato<sup>5</sup>, Daisuke Saito<sup>4</sup>, Tatsuo Miyamoto<sup>6</sup>, Naoki Goshima<sup>7</sup>, Hideaki Ito<sup>1</sup>, and Kenji Kasai<sup>1</sup>

<sup>1</sup>Department of Pathology, Aichi Medical University School of Medicine, Nagakute 480-1195, Japan

<sup>2</sup>Department of Urology, Aichi Cancer Center Hospital, Nagoya 464-8681, Japan

<sup>3</sup>Project for Prevention of HPV-Related Cancer, Exploratory Oncology Research and Clinical Trial Center, National Cancer Center, Chiba 277-8577, Japan

<sup>4</sup>Department of Biology, Faculty of Sciences, Kyushu University, Fukuoka, 819-0395, Japan

<sup>5</sup>Institute of Transformative Bio-Molecules (WPI-ITbM), Nagoya University, Nagoya 464-8601, Aichi, Japan

<sup>6</sup>Department of Molecular and Cellular Physiology, Yamaguchi University Graduate School of Medicine, Ube 755-8505, Japan

<sup>7</sup>Molecular Profiling Research Center for Drug Discovery, National Institute of Advanced Industrial Science and Technology, Tokyo 135-0064, Japan

\*Correspondence should be addressed to Akihito Inoko, M.D., Ph.D.

Department of Pathology, Aichi Medical University School of Medicine

1-1 Yazakokarimata, Nagakute, Aichi 480-1195, Japan

E-mail: inoko.akhito.288@mail.aichi-med-u.ac.jp

Phone +81-561-62-3311, Fax +81-561-61-2350

ORCID 0000-0002-6739-2948

**The PDF file includes**

**Supplementary Figure 1** | Biological replicates with donor 2 and additional details for Figure 1.

**Supplementary Figure 2** | Biological replicates with donor 2 and additional data for Figure 3.

**Supplementary Figure 3** | Biological replicates with donor 2 and additional data for Figure 4.

**Supplementary Figure 4** | Biological replicates with donor 2 and additional data for Figure 5.

**Supplementary Figure 1. Biological replicates with donor 2 and additional details for Figure 1.**

**(A-D)** Biological replicates of data in Figure 1, A, C, D, and E (donor 1) with independent donor 2. **(E)** Wide-field images of Figure 1 D plus an image of YDA-depleted cells extending the culture period up to 5 days. The extension did not improve the degree of differentiation. **(F)** P63 $\alpha$  antibody used for this research showed a single band at a molecular weight of 72 kDa in immunoblotting (donor 1), suggesting the recognition of  $\Delta$  Np63 $\alpha$  as per a previous report [35]. Abbreviations of inhibitors: Y, 10  $\mu$ M Y-27632; D, 1  $\mu$ M DMH1; A, 1  $\mu$ M A-83-01; and C, 1  $\mu$ M CHIR99021. Scale bars, 100  $\mu$ m, 10  $\mu$ m, and 10  $\mu$ m in B, C, and E, respectively.

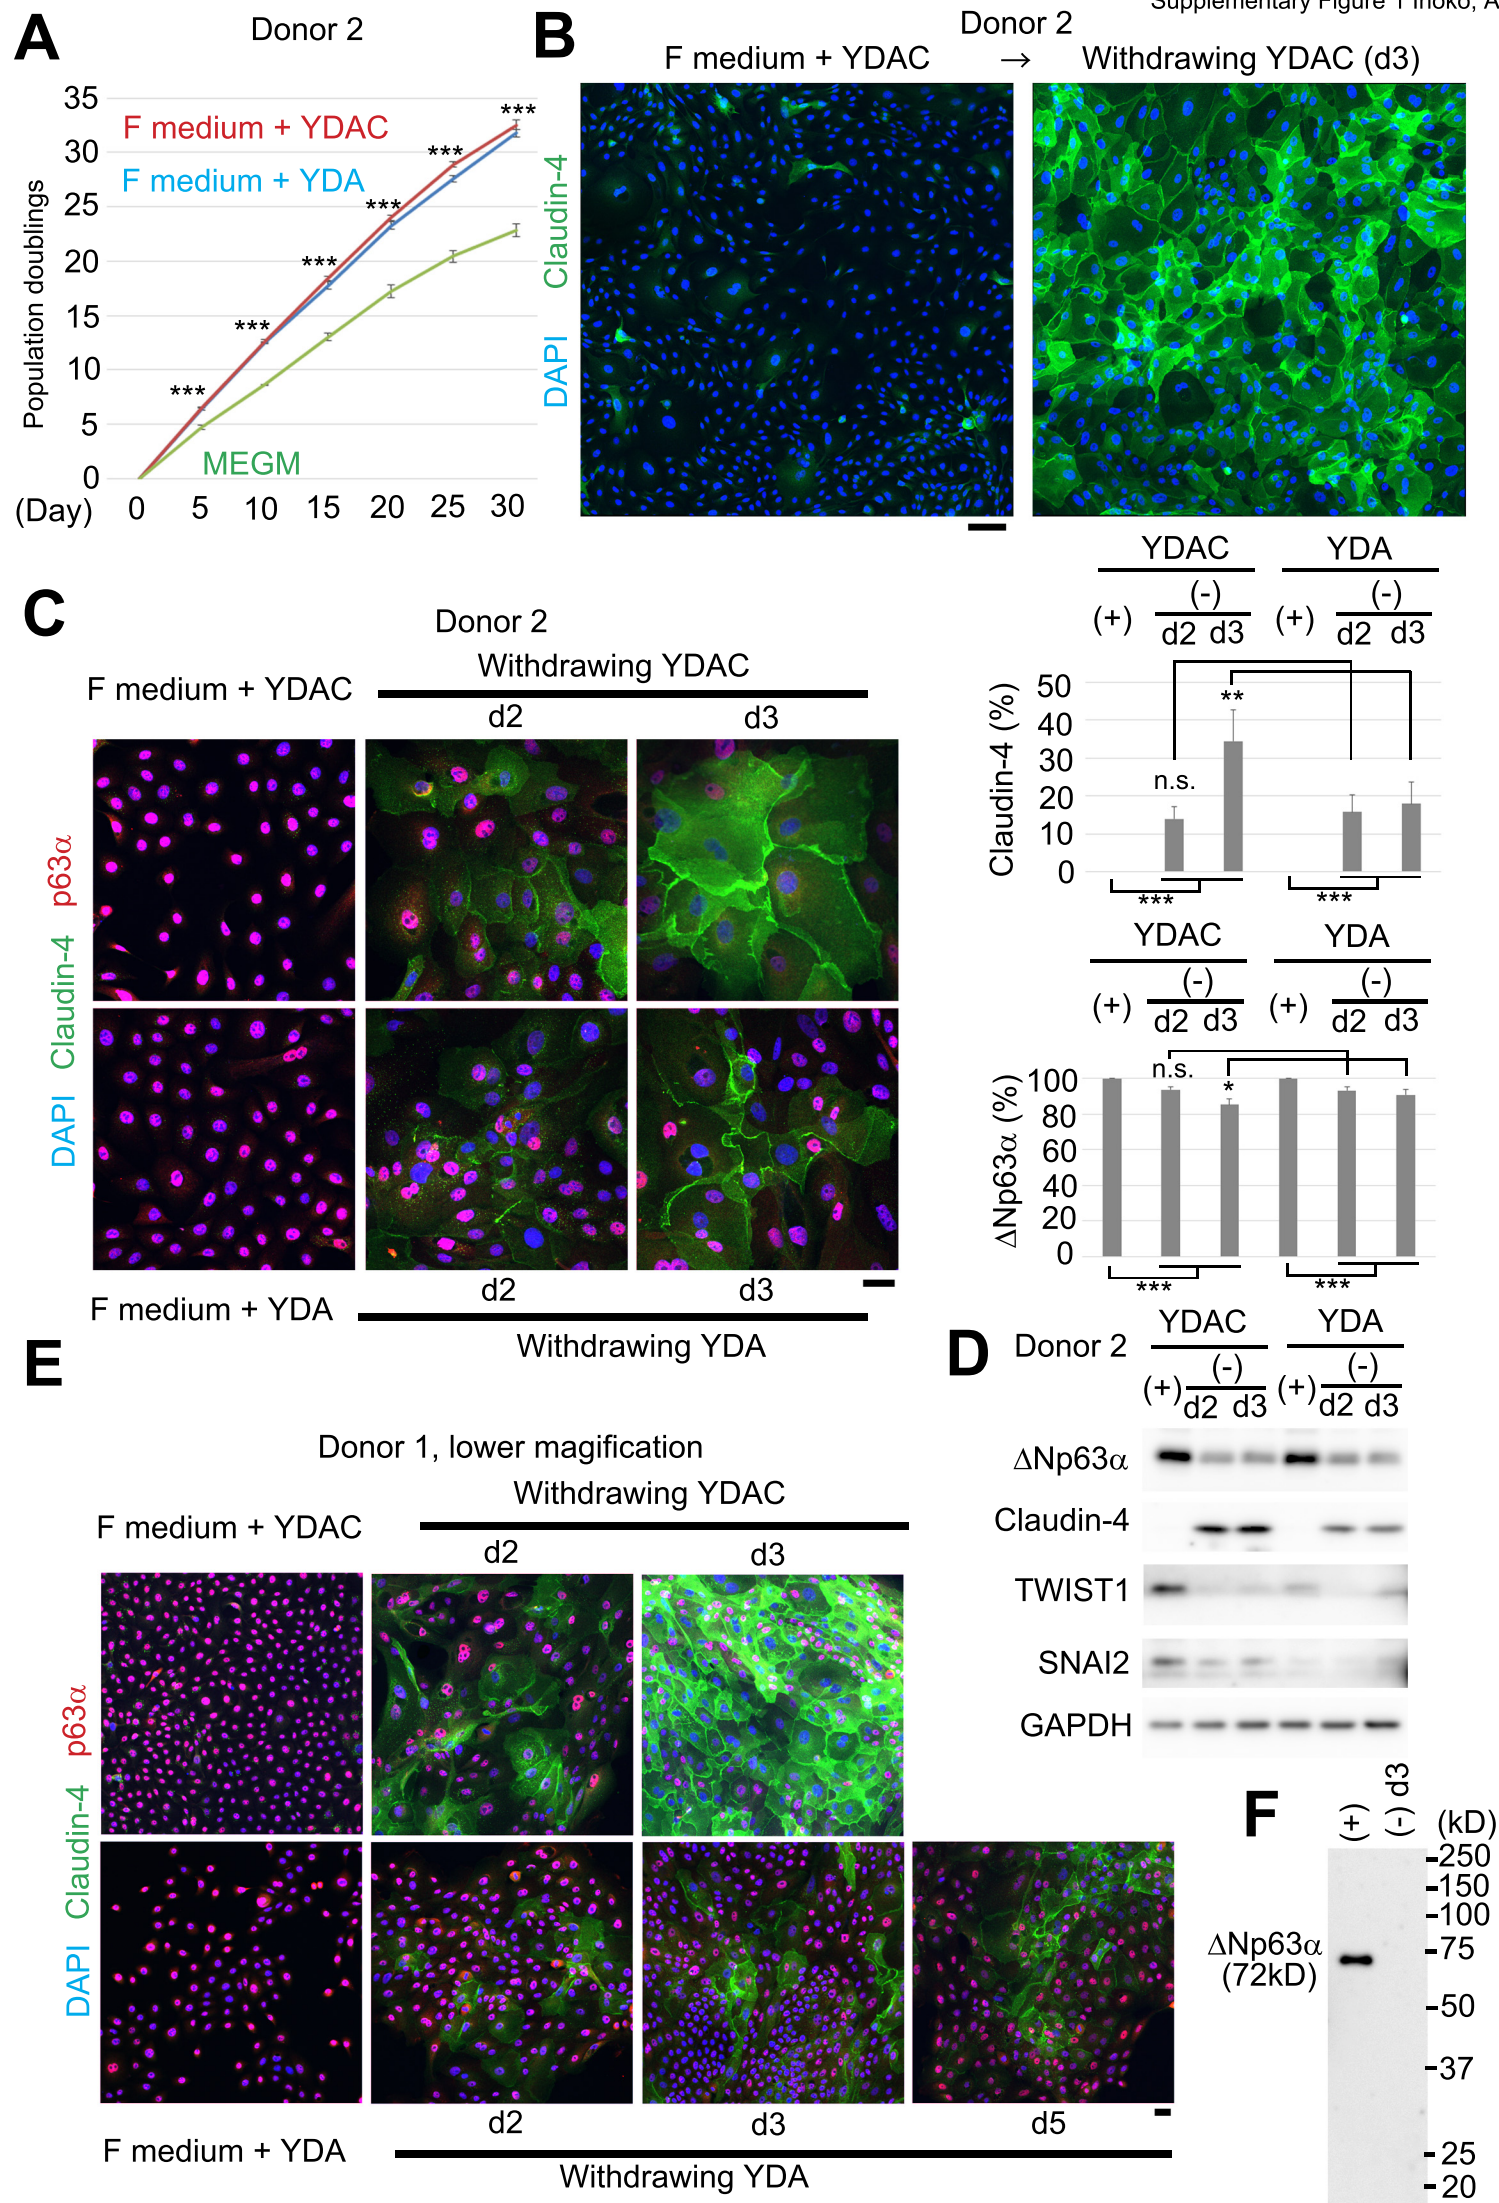

**Supplementary Figure 2. Biological replicates with donor 2 and additional data for Figure 3.**

**(A-E)** Biological replicates of data in Figure 3 B–E (donor 1) with independent donor 2. **(F)** YDAC-maintained HMECs in Matrigel form well-polarized cystic structures on day 8 with partial expression of EGR1 and ELF3, suggesting heterogeneity in differentiation (immunostaining, arrows). Details are provided in the Materials and Methods section. **(G)** Phase-contrast micrograph of our new method for culturing mammary cells in an in vivo-like bilayer. The bilayer was assembled by culturing cells in the YDAC medium for approximately 3 days after they reached confluence. Cells on the first day of confluence (d1) were compressed and partially layered, and eventually bilayered (d2-3). Bilayering can be estimated based on the intersection of two types of cell-cell boundaries (d3-). See also Figure 3 H. Scale bars, 10  $\mu$ m.



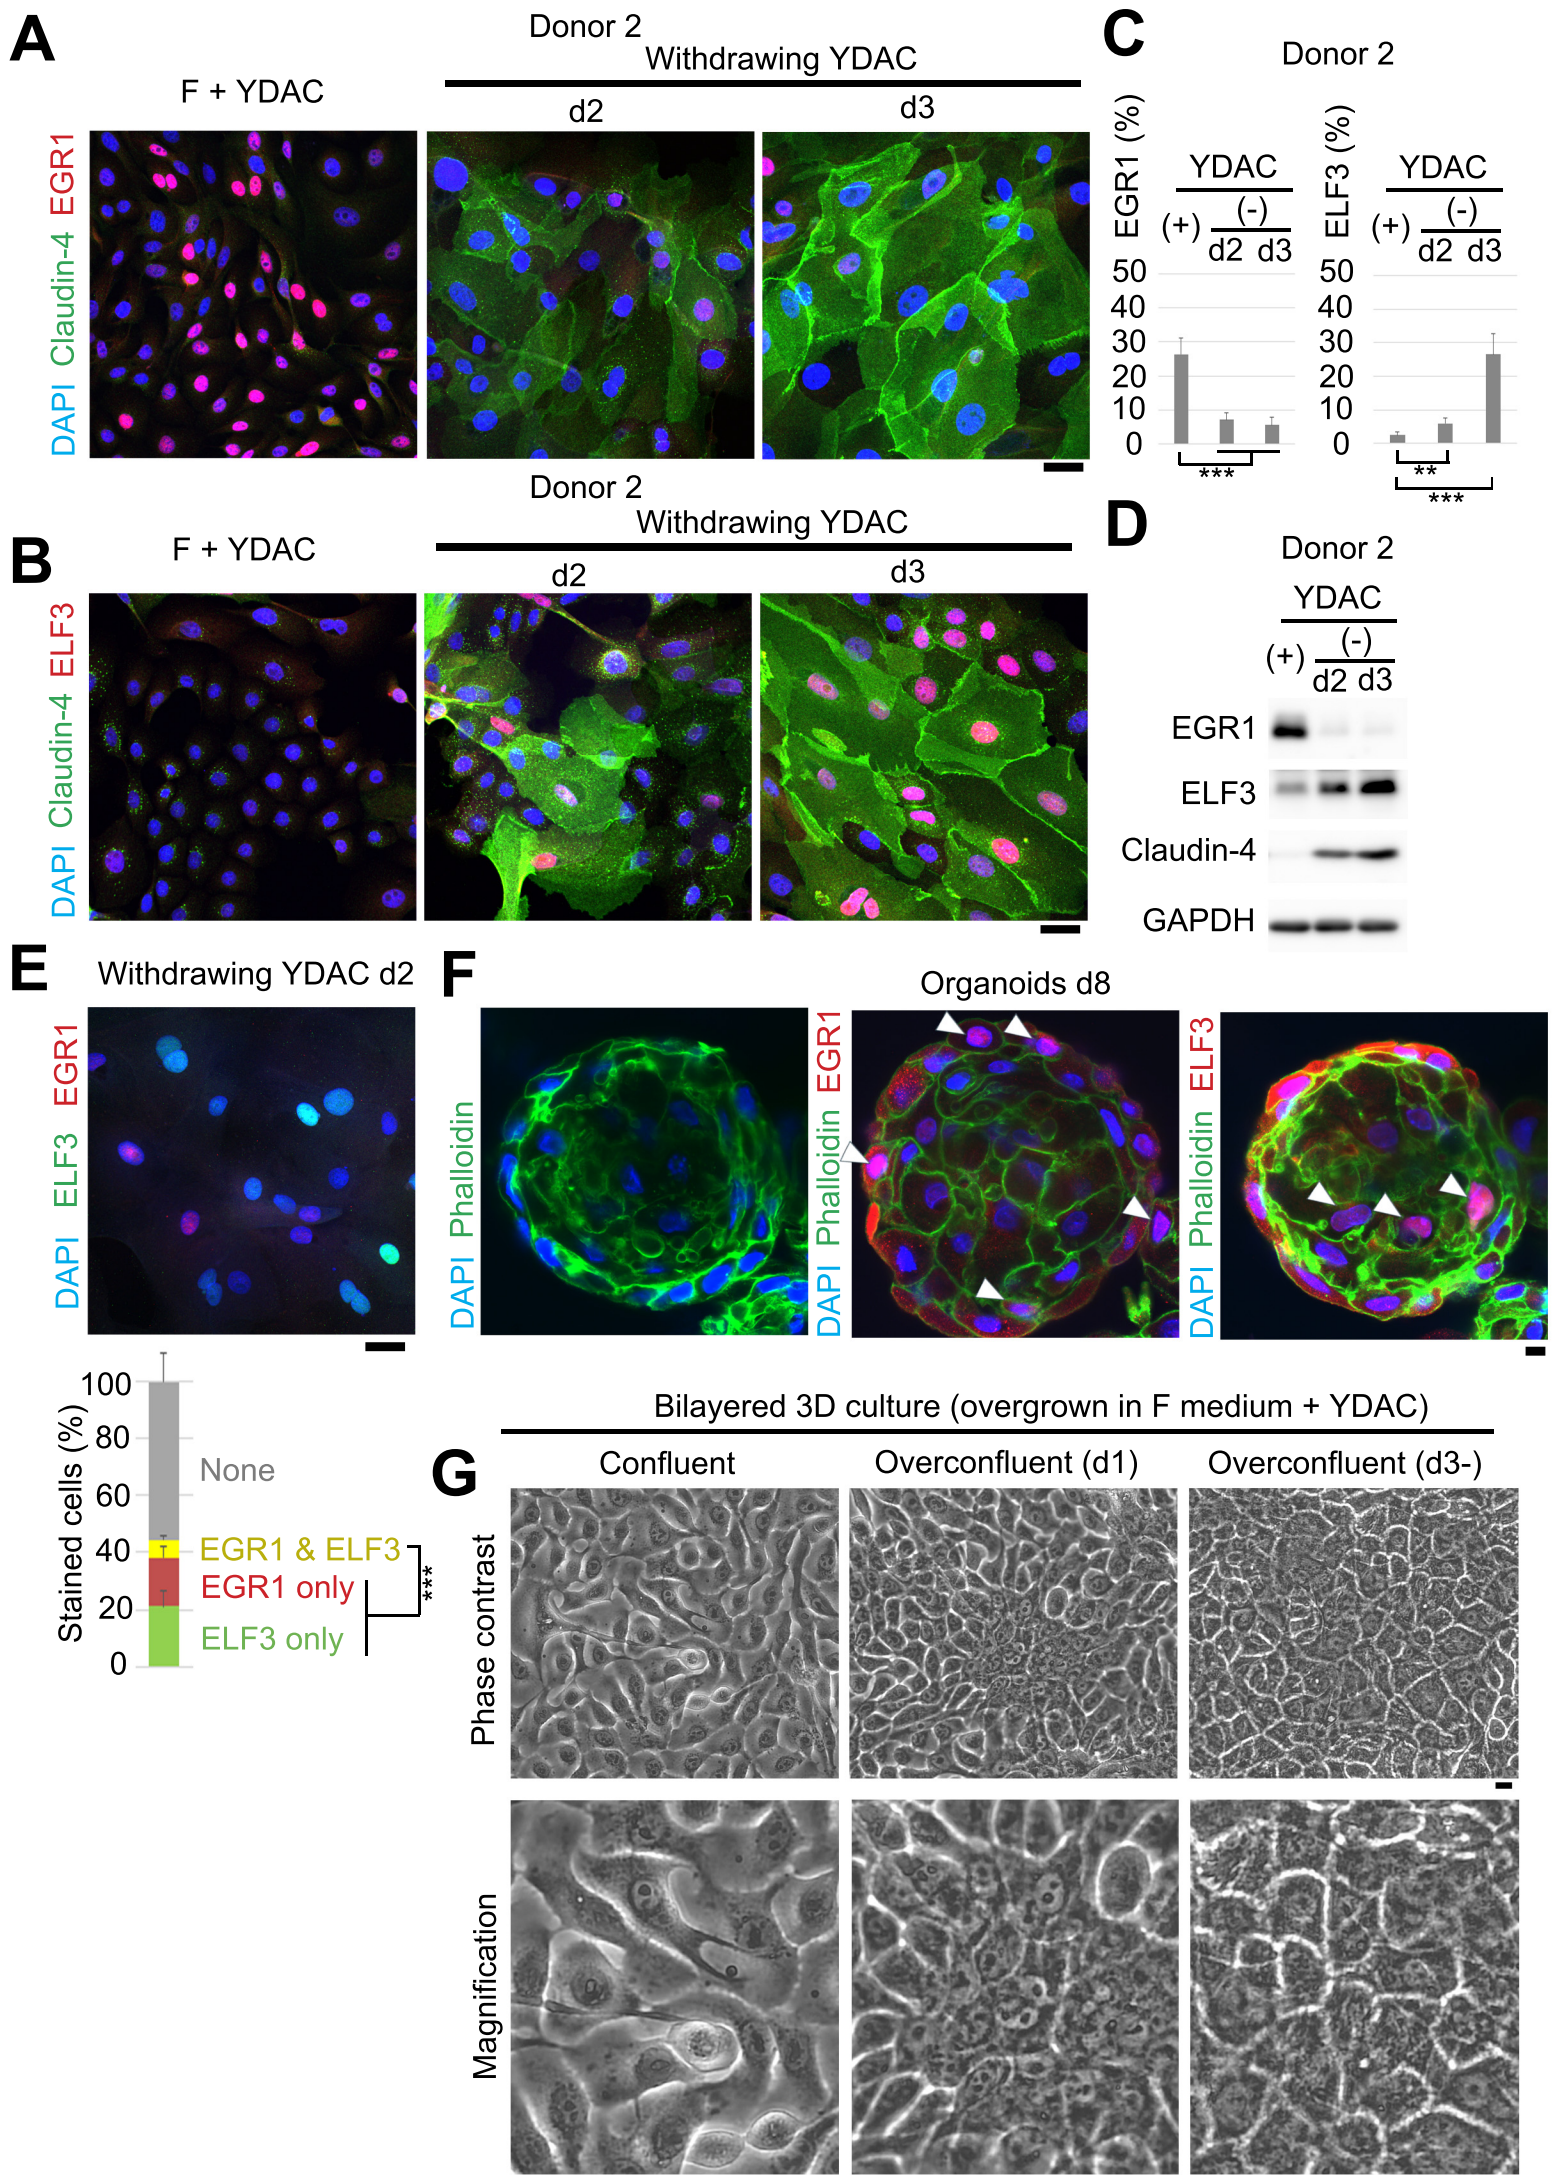

**Supplementary Figure 3. Biological replicates with donor 2 and additional data for Figure 4.**

**(A and B)** Biological replicates of data in Figure 4 A and B (donor 1) with independent donor 2. **(C)** Left, phase-contrast images of siEGR1-treated organoids from independent donors. Right, quantification of the organoids larger than 80  $\mu\text{m}$  in diameter. Fifty organoids were counted in each group ( $n=3$ ). Scale bars, 10  $\mu\text{m}$  and 100  $\mu\text{m}$ , in A and C, respectively.



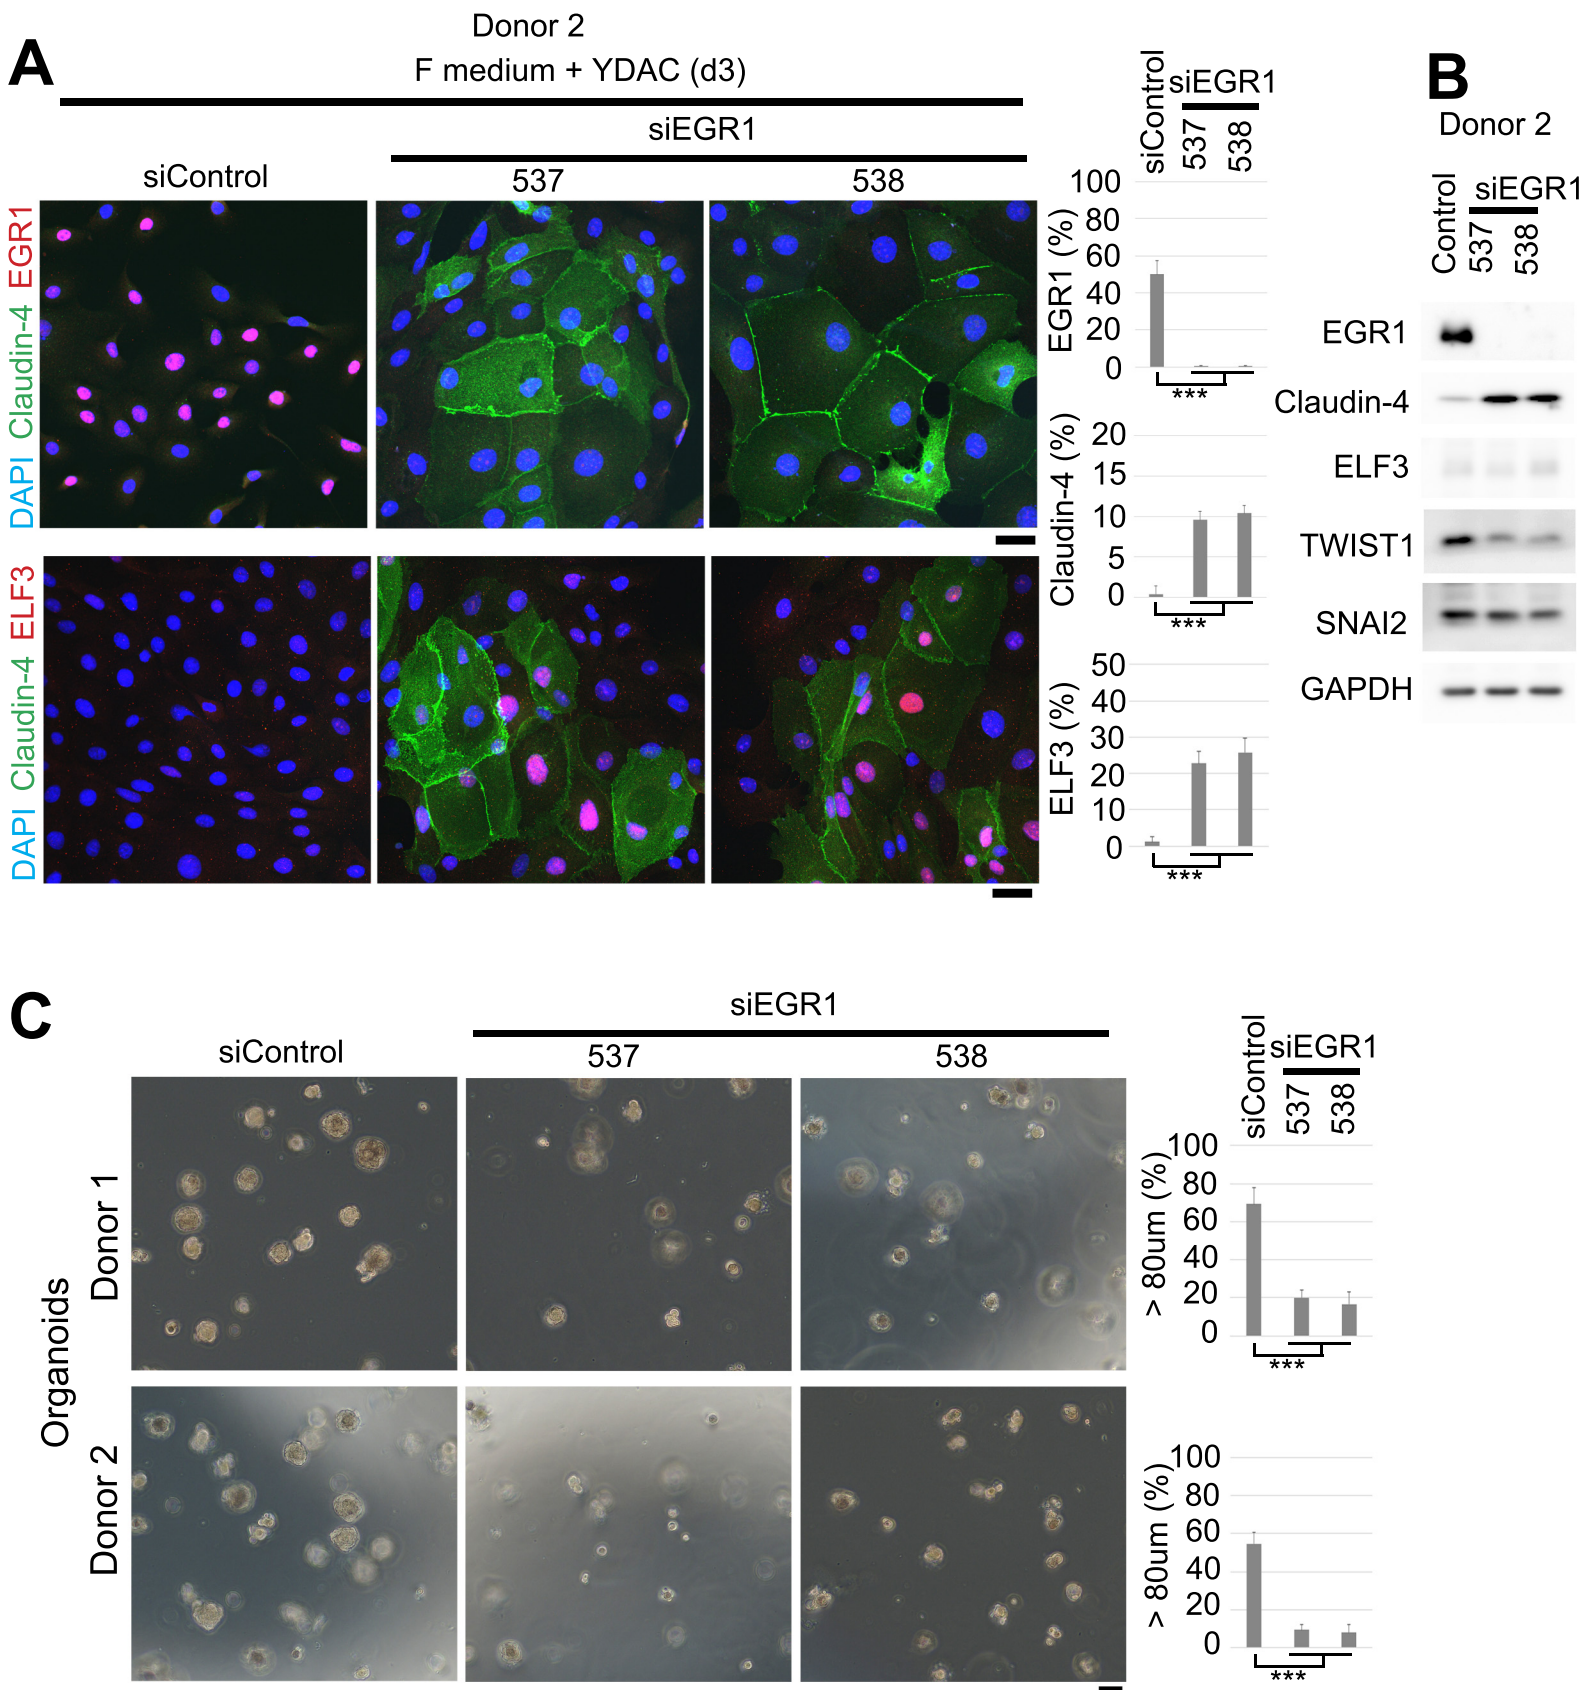



**Supplementary Figure 4. Biological replicates with donor 2 and additional data for Figure 5.**

**(A-C)** Biological replicates of Figure 5 A-C (donor 1) with independent donor 2. **(D)** Left, phase-contrast images of siELF3-treated organoids from independent donors. Right, quantification of the organoids with a bumpy shape. Fifty organoids were counted in each group (n=3). Scale bars, 10  $\mu$ m, 10  $\mu$ m, and 100  $\mu$ m, in A, C, and D, respectively.

**A**Donor 2  
Withdrawing YDAC (d3)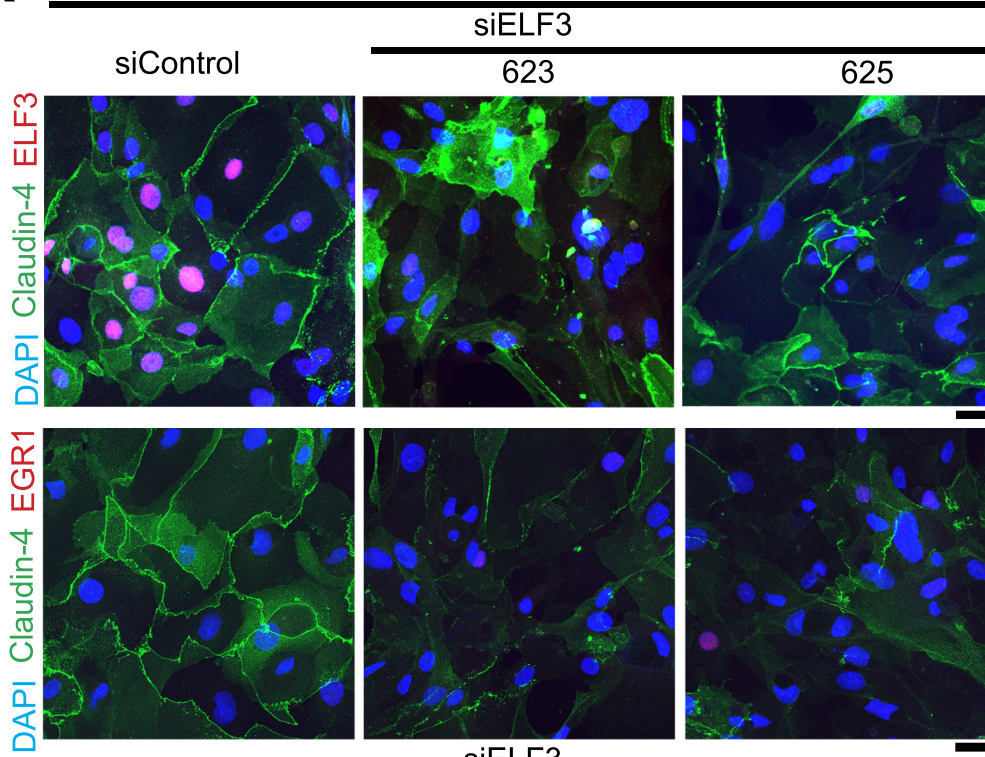**C**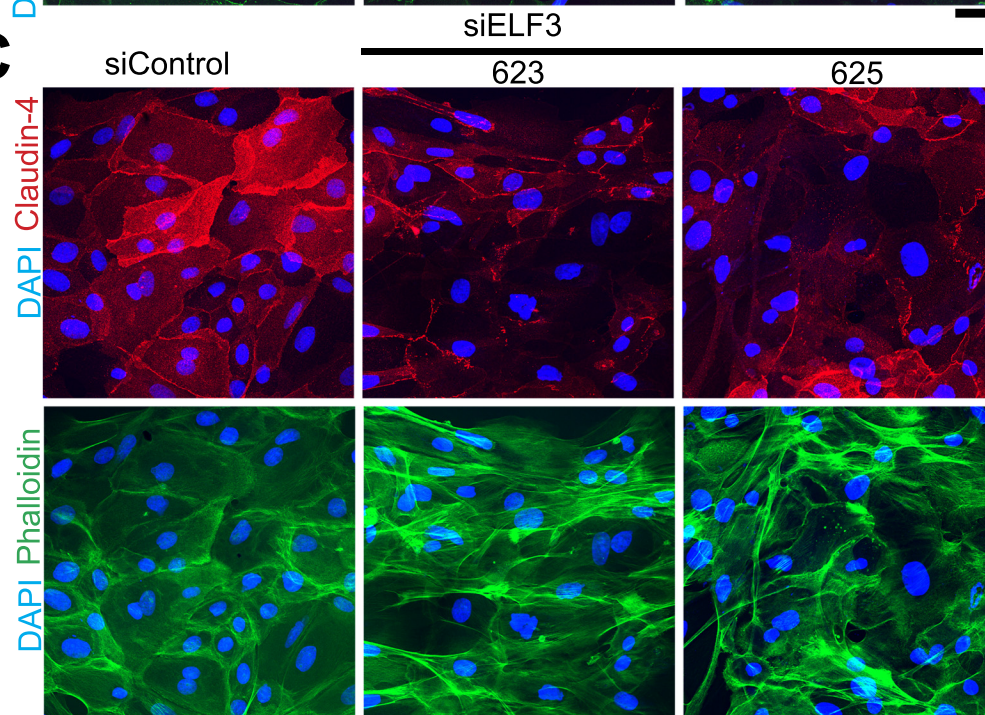**D**Organoids  
Donor 1  
Donor 2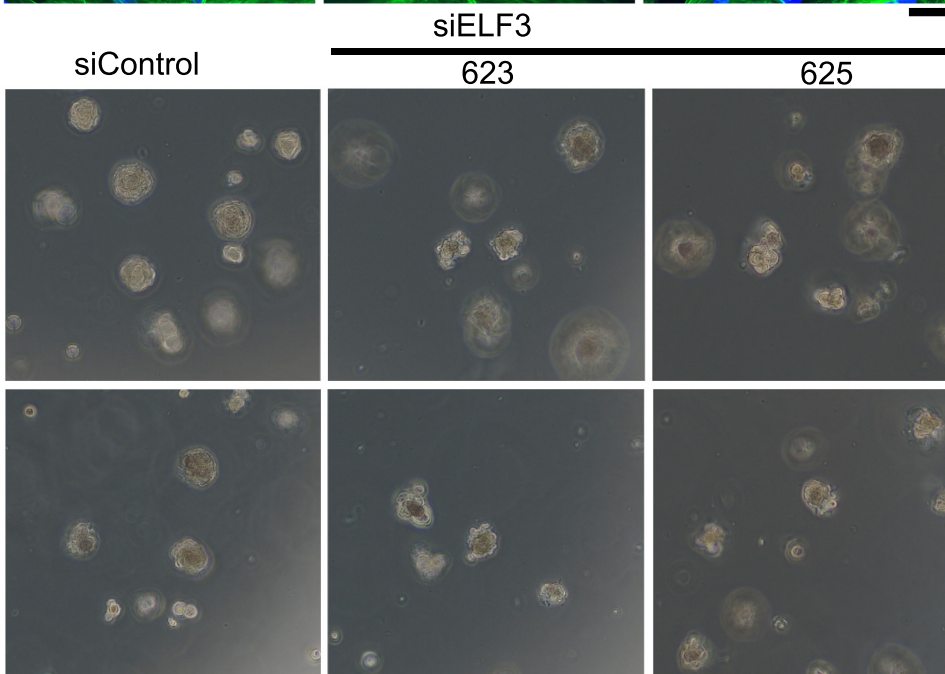**B**

Donor 2

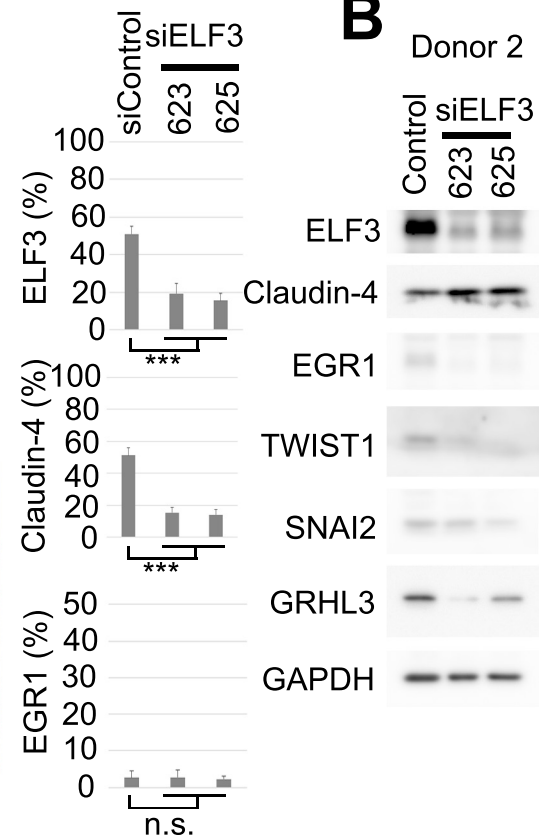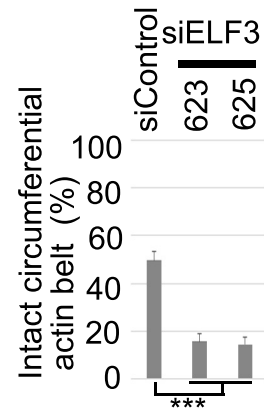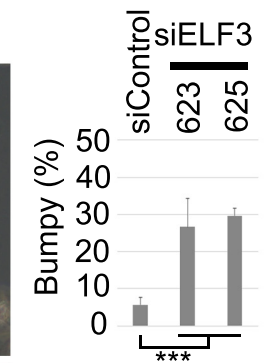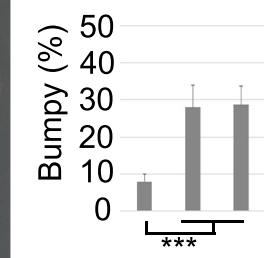

Supplement: MOESM1 [file 41598_2025_95463_MOESM1_ESM.pdf]
